# Supplementary material
Source: Frontiers journal article supplement (https://www.frontiersin.org/articles/262767)
Supplement: Image_3.PDF [file Image_3.PDF]

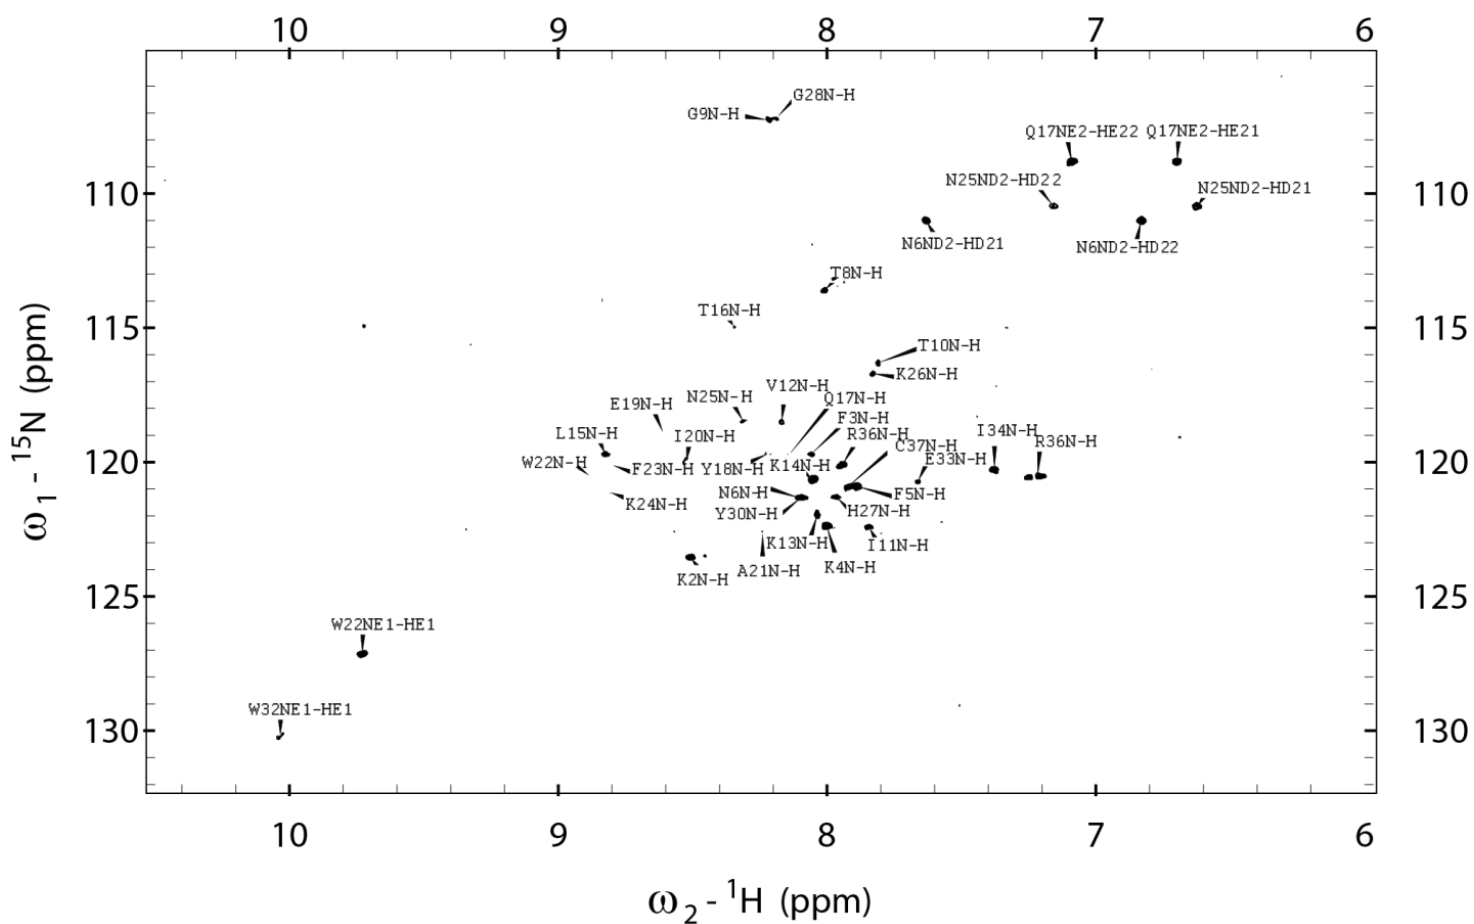

**Supplementary FIG 3.**

$^{15}\text{N}$  HSQC spectrum of EntK1 in 50% TFE with chemical shift assignments.
